# Supplementary material for: Socio-Demographic Characteristics of COVID-19 Vaccine Recipients in Kwara State, North Central Nigeria
Source: PubMed Central journal article supplement (PMC8766999; doi:10.3389/fpubh.2021.773998), 2022-01-05

## Supplementary data

Figure S1. Flow-diagram for multi-stage sampling of COVID-19 recipients in Kwara State (n=2,936).

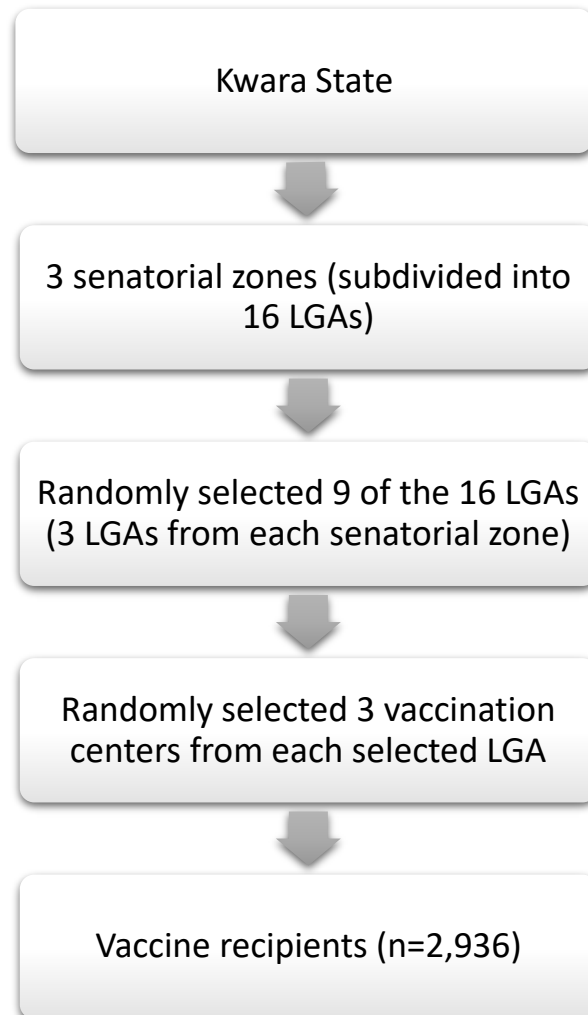

Supplement: Data_Sheet_1.pdf [file Data_Sheet_1.pdf]
